# Supplementary material for: Reversible colour changes of binary films composed of azobenzene-based amorphous molecular materials and p-toluene sulfonic acid in response to exhaled breath
Source: Royal Society of Chemistry journal article supplement (doi:10.1039/c4ra10360b), 2014-12-03
Supplement: c4ra10360b1.pdf [file c4ra10360b1.pdf]

Legends of Supplementary Videos

**Reversible colour changes of binary films composed of azobenzene-based amorphous molecular materials and *p*-toluene sulfonic acid in response to exhaled breath**

Ryoji Ichikawa,<sup>a</sup> Eisuke Nagata<sup>a</sup> and Hideyuki Nakano<sup>\*a</sup>

**Video 1.mpg :** This file contains Supplementary Video 1. The video shows the reversible colour changes of the binary film of BMAB and TsOH (BMAB–TsOH). When we breathed into the film, the colour of the film changed immediately from bluish purple to yellow. When pausing the breath, the colour returned to the original.

**Video 2.mpg :** This file contains Supplementary Video 2. The video shows the colour change of the BMAB–TsOH film by exposure of vapours. The colour of the film changed from bluish purple to yellow by exposure of water vapour whereas no colour change was observed upon exposure of hexane vapour.
