# Supplementary material for: Reversible colour changes of binary films composed of azobenzene-based amorphous molecular materials and p-toluene sulfonic acid in response to exhaled breath
Source: Royal Society of Chemistry journal article supplement (doi:10.1039/c4ra10360b), 2014-12-03
Supplement: c4ra10360b2.pdf [file c4ra10360b2.pdf]

Supplementary Figures

## Reversible colour changes of binary films composed of azobenzene-based amorphous molecular materials and *p*-toluene sulfonic acid in response to exhaled breath

Ryoji Ichikawa,<sup>a</sup> Eisuke Nagata<sup>a</sup> and Hideyuki Nakano<sup>\*a</sup>

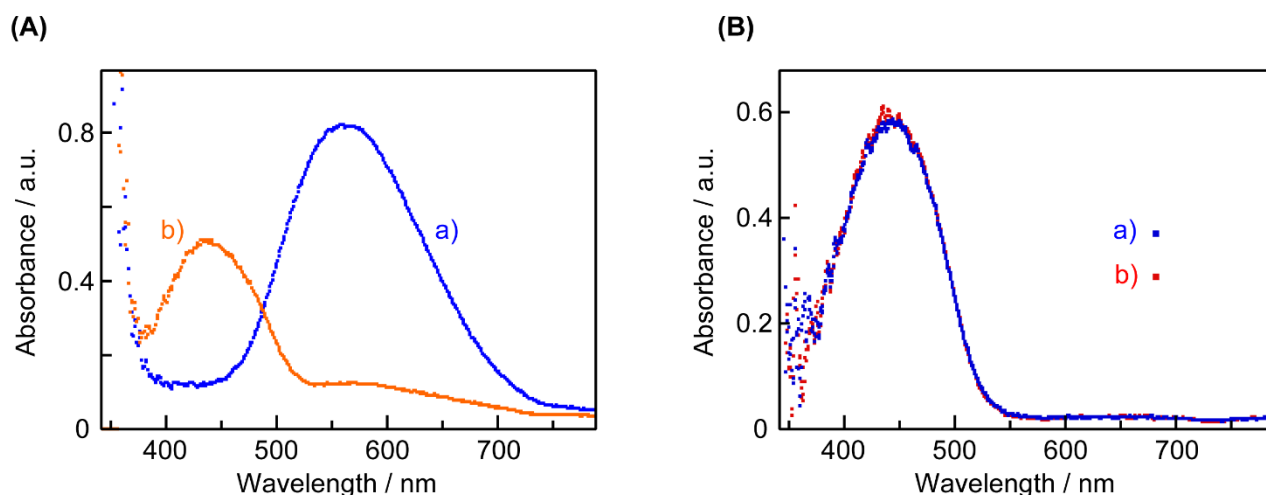

**Fig. S1.** Electronic absorption spectral changes of (A) PBAB-TsOH film and (B) BMAB film without TsOH. (a) at ambient atmosphere. (b) when breathing onto the film.

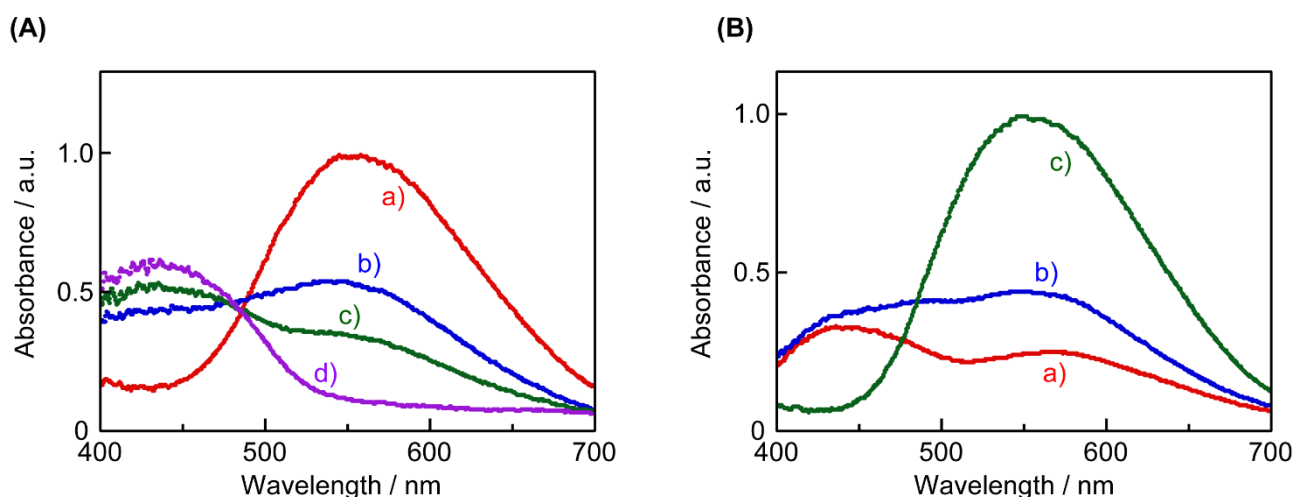

**Fig. S2.** (A) Electronic absorption spectra of BMAB-TsOH film at a variety of relative humidity (RH). RH = (a) ca. 40%, (b) ca. 50%, (c) ca. 60%, (d) ca. 70%. (B) Electronic absorption spectra of the binary films of BMAB and TsOH with molar ratios of (a) ca. 1:0.5, (b) ca. 1:1, and (c) ca. 1:2.

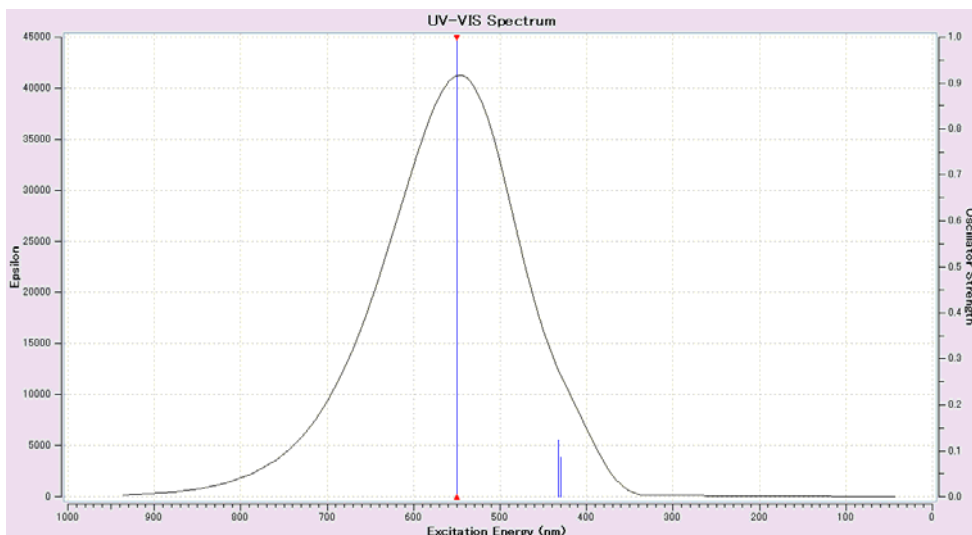

**Fig. S3.** Electronic absorption spectrum of BMAB-H<sup>+</sup> predicted by ab initio calculation based on density-function theory at B3LYP/6-31G(d,p) level performed with the Gaussian 09.

(a)

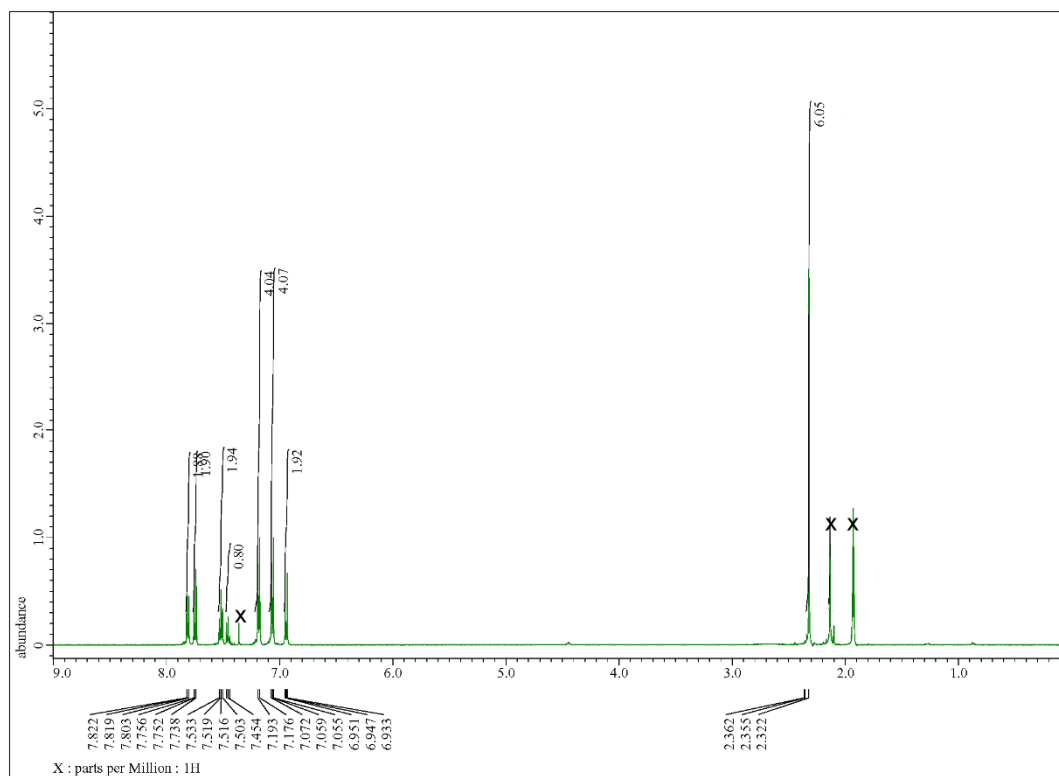

**(Fig. S4.** Continued to next page.)

1H NMR spectrum (400 MHz, CDCl<sub>3</sub>) of compound 10. The spectrum shows several peaks with the following chemical shifts (ppm): 7.946, 7.927, 7.844, 7.705, 7.688, 7.538, 7.358, 7.342, 7.293, 7.276, 7.256, 7.240, 4.821, 2.394, 2.378, and 1.99. Integration values are provided for the peaks: 7.946, 7.927, 7.844, 7.705, 7.688, 7.538, 7.358, 7.342, 7.293, 7.276, 7.256, 7.240, 4.00, 2.16, 11.98, 19.99, 2.394, and 2.378. A small peak at 2.0 ppm is marked with an 'X'.

abundance

7.0  
6.0  
5.0  
4.0  
3.0  
2.0  
1.0  
0

9.0 8.0 7.0 6.0 5.0 4.0 3.0 2.0 1.0

1.75  
7.10  
0.90  
2.05  
11.46  
4.00  
1.97

16.00  
17.40

X

3.226  
2.338  
2.316

7.8141  
7.8001  
7.7988  
7.7777  
7.7559  
7.6332  
7.6238  
7.6119  
7.6115  
7.5115  
7.4999  
7.2226  
7.2111  
7.1980  
7.0884  
7.0711  
7.0668  
6.9277  
6.9009

X : parts per Million : 1H

**Fig. S4.**  $^1\text{H}$  NMR spectra for BMAB-TsOH- $\text{D}_2\text{O}$  system in  $\text{CD}_3\text{CN}$ . (a) BMAB. (b) BMAB-TsOH $\cdot\text{H}_2\text{O}$  ([TsOH]/[BMAB] = ca. 4). (c) After addition of excess  $\text{D}_2\text{O}$  into the solution of BMAB-TsOH $\cdot\text{H}_2\text{O}$ .
